# Supplementary material
Source: PubMed Central journal article supplement (PMC7156207)

- Teleostomi
- Chondrichthyes
- Amphibian
- Reptilia
- Aves
- Mammalia

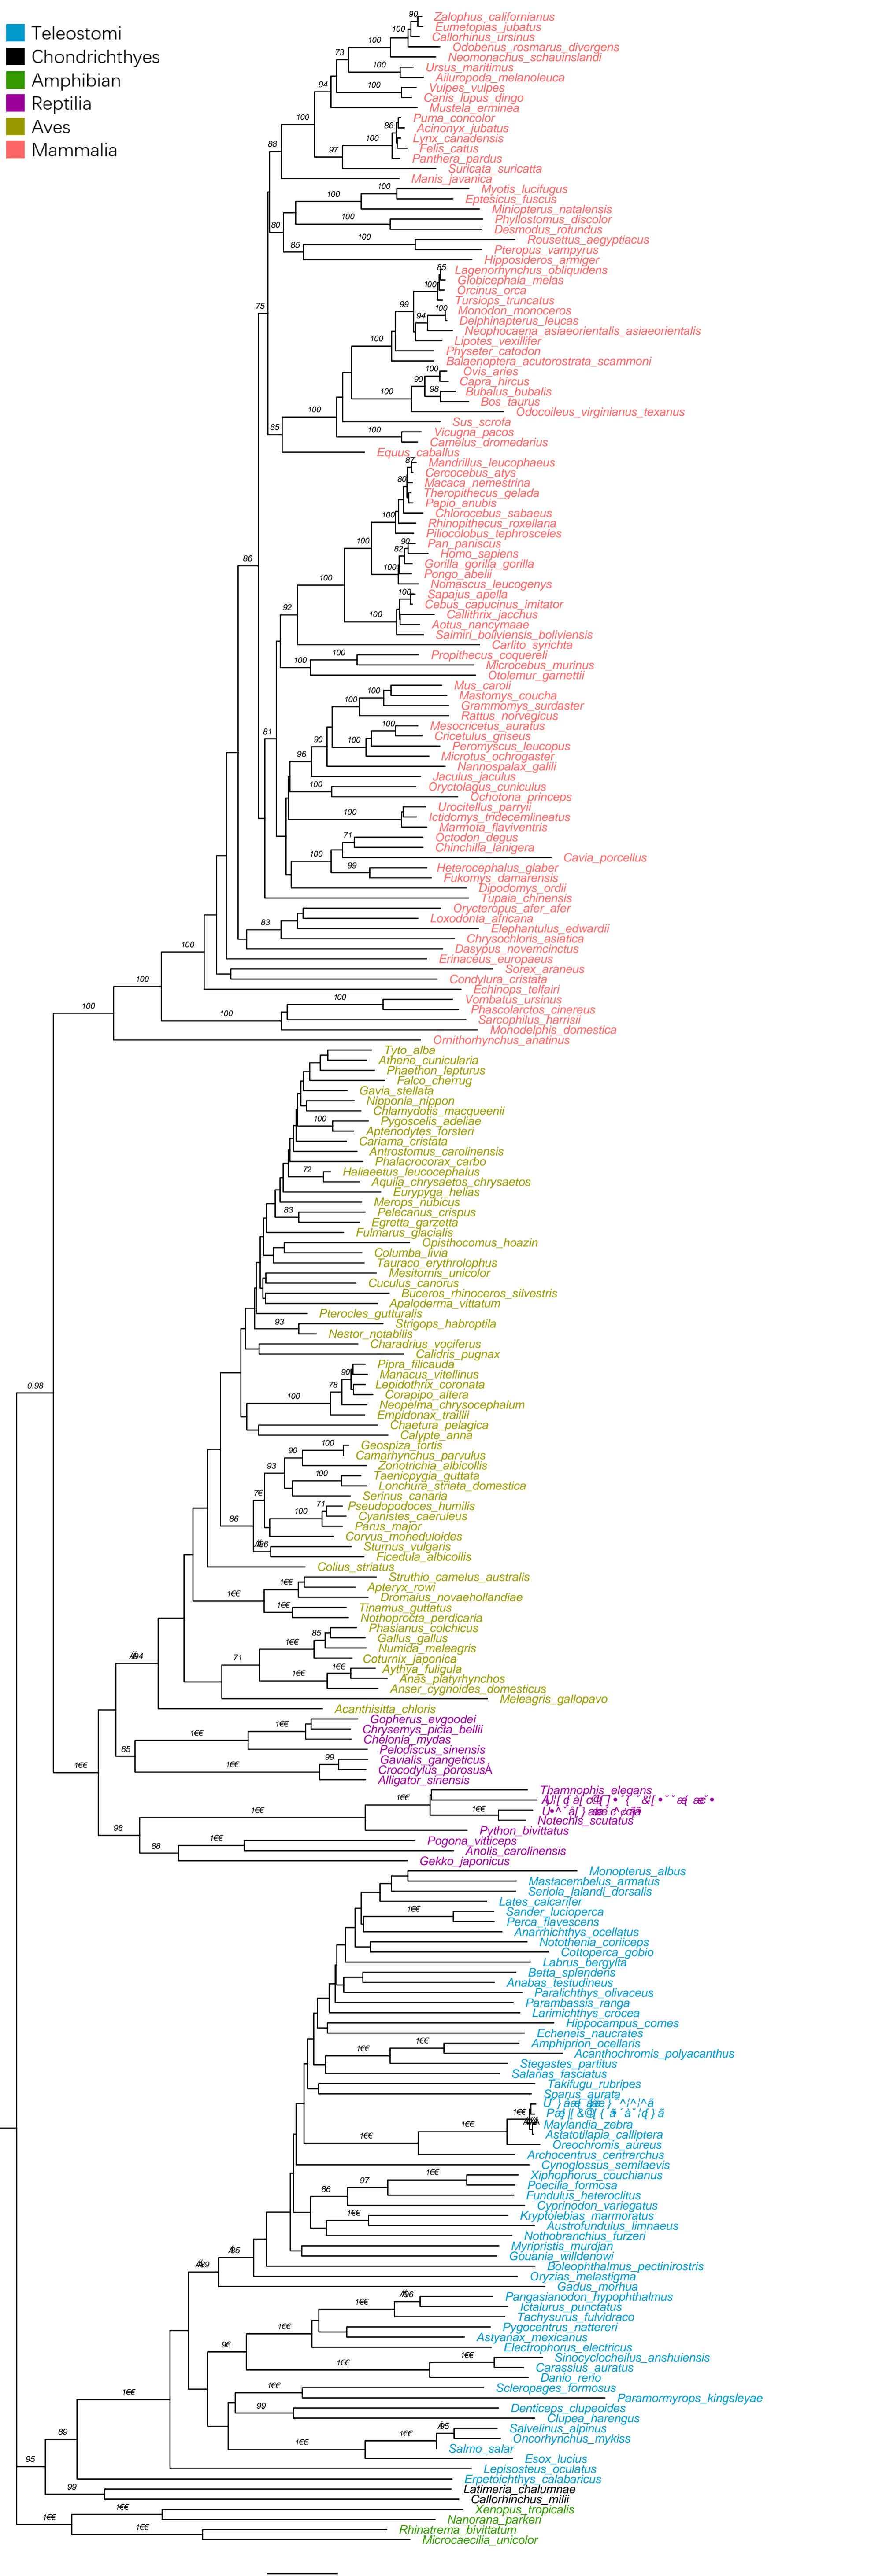

Supplement: mmc4.pdf [file mmc4.pdf]
